# Supplementary material for: Synergistic use of electroosmotic flow and magnetic forces for nucleic acid extraction
Source: Royal Society of Chemistry journal article supplement (doi:10.1039/c9an02191d), 2020-01-01
Supplement: c9an02191d1.pdf [file c9an02191d1.pdf]

## Synergistic Use of Electroosmotic Flow and Magnetic forces for Nucleic Acid Extraction

Rachel N. Deraney, Lindsay Schneider, Anubhav Tripathi

### Electronic Supplementary Information

SI Figure 1: A photograph of the microchip used in this study. A) Shows microchip at an angle to display channels while B) has electrodes set for run

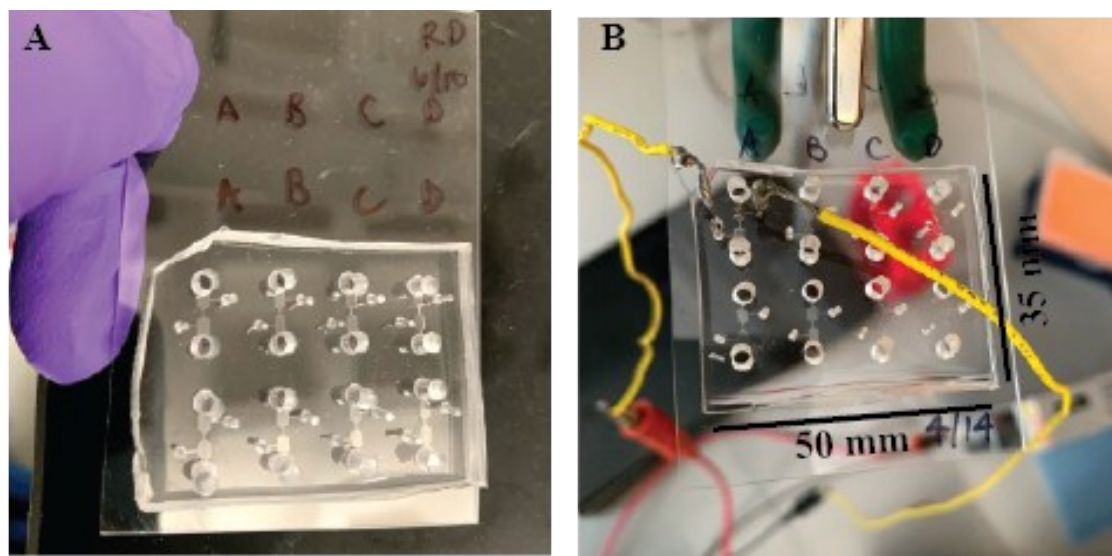

SI Figure 2: Calibration curve used for HPV concentration versus PCR ct value.

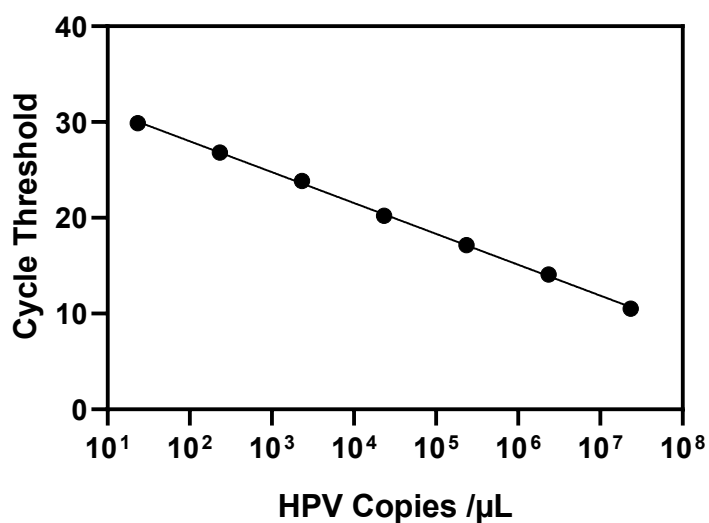

PCR Cycling Conditions:

|      |            |           |
|------|------------|-----------|
| 95°C | 5 minutes  |           |
| 95°C | 5 seconds  | Cycle 40x |
| 54°C | 10 seconds |           |
| 72°C | 30 seconds |           |
